# Supplementary material for: Integrative structural profiling and ligand optimisation across the transthyretin mutational landscape
Source: Springer Nature journal article supplement (doi:10.1038/s41540-025-00582-2), 2025-09-25
Supplement: MOESM1 [file 41540_2025_582_MOESM1_ESM.pdf]

# Supplementary Information

July 30, 2025

## Supplementary Tables

Supplementary Table 1: Single-point mutation effect on Gibbs Free Energy predictions of multiple softwares

| Mutation | mCSM      | SDM       | DUET      | DynaMut2  | DDGun     | MAESTRO   | SAAFEC    |
|----------|-----------|-----------|-----------|-----------|-----------|-----------|-----------|
| C10R     | 0.048000  | 0.000000  | 0.337000  | 1.090000  | 0.100000  | 0.095675  | -0.980000 |
| L12P     | -1.623000 | -4.310000 | -2.304000 | -1.510000 | -2.900000 | 3.504819  | -1.690000 |
| M13I     | -1.911000 | 0.970000  | -1.285000 | -1.210000 | -0.100000 | 0.480930  | -0.610000 |
| D18G     | -0.906000 | -0.900000 | -0.968000 | -0.480000 | -1.800000 | 2.058429  | -0.730000 |
| D18N     | -0.815000 | 0.440000  | -0.504000 | -1.040000 | -0.400000 | 1.346156  | -0.500000 |
| D18E     | -0.579000 | -0.290000 | -0.338000 | 0.020000  | -0.800000 | 1.176819  | -0.550000 |
| A19D     | -0.522000 | -0.430000 | -0.223000 | -0.170000 | -1.300000 | 1.805418  | -0.850000 |
| V20I     | -0.393000 | 0.030000  | -0.067000 | -0.110000 | -0.200000 | -0.160910 | -0.900000 |
| R21Q     | -0.282000 | -0.380000 | -0.171000 | -0.270000 | -0.400000 | -0.036758 | -0.200000 |
| S23N     | -0.411000 | 0.690000  | 0.011000  | 0.060000  | -0.100000 | 1.436890  | -0.570000 |
| P24S     | -1.185000 | 0.530000  | -0.747000 | -1.320000 | -2.900000 | 0.872833  | -1.220000 |
| A25S     | -1.950000 | -1.860000 | -2.034000 | -1.560000 | -1.100000 | 2.452239  | -1.130000 |
| A25T     | -1.694000 | -1.580000 | -1.711000 | -1.350000 | -1.100000 | 2.044710  | -1.100000 |
| V28S     | -2.668000 | -3.200000 | -2.970000 | -3.430000 | -3.800000 | 3.216426  | -2.310000 |
| V28M     | -0.918000 | -1.590000 | -1.181000 | -1.370000 | -1.000000 | 1.022958  | -1.330000 |
| V30G     | -2.920000 | -3.200000 | -3.472000 | -4.180000 | -5.400000 | 4.724899  | -2.640000 |
| V30A     | -2.428000 | -2.660000 | -2.887000 | -2.580000 | -3.400000 | 3.477366  | -1.670000 |
| V30M     | -0.949000 | -2.390000 | -1.400000 | -1.010000 | -1.800000 | 1.659947  | -1.240000 |
| V30L     | -1.071000 | -1.500000 | -1.166000 | -1.320000 | -1.500000 | 1.067225  | -0.950000 |
| V32G     | -2.267000 | -3.200000 | -2.811000 | -3.290000 | -3.500000 | 4.482067  | -2.670000 |
| V32A     | -1.671000 | -2.660000 | -2.082000 | -2.330000 | -2.100000 | 2.085456  | -1.620000 |
| F33C     | -1.490000 | 0.270000  | -1.259000 | -2.060000 | -2.300000 | 1.275398  | -1.470000 |
| F33L     | -1.847000 | 0.110000  | -1.675000 | -2.210000 | -0.800000 | 1.191928  | -1.460000 |
| F33V     | -2.270000 | 1.050000  | -1.911000 | -3.270000 | -0.900000 | 1.433640  | -1.360000 |
| F33I     | -1.847000 | 0.590000  | -1.584000 | -2.430000 | -0.800000 | 1.298581  | -1.450000 |
| R34G     | -2.396000 | 0.190000  | -2.079000 | -3.130000 | -1.900000 | 1.555289  | -1.010000 |

*Continued on next page*

| Mutation | mCSM      | SDM       | DUET      | DynaMut2  | DDGun     | MAESTRO   | SAAFEC    |
|----------|-----------|-----------|-----------|-----------|-----------|-----------|-----------|
| R34T     | -1.829000 | -0.480000 | -1.719000 | -2.080000 | -0.900000 | 0.926791  | -0.450000 |
| K35T     | -1.401000 | 0.340000  | -1.094000 | -1.330000 | 0.800000  | 0.939181  | -0.250000 |
| K35N     | -1.061000 | -0.390000 | -0.942000 | -1.020000 | 0.200000  | 1.076140  | 0.010000  |
| A36D     | -1.381000 | -1.790000 | -1.436000 | -0.550000 | 0.200000  | 1.742734  | -0.120000 |
| A36P     | -0.695000 | -1.750000 | -0.814000 | -0.150000 | -0.100000 | 1.086776  | -0.200000 |
| D38V     | 0.188000  | -0.120000 | 0.390000  | -0.120000 | -0.100000 | 0.641339  | 0.080000  |
| D38A     | 0.037000  | -0.480000 | 0.150000  | -0.070000 | -0.400000 | 1.333339  | 0.010000  |
| D39V     | 0.040000  | 1.180000  | 0.523000  | -0.220000 | 0.000000  | 0.486930  | 0.050000  |
| W41L     | -2.187000 | -0.130000 | -1.754000 | -1.430000 | -2.200000 | 1.562413  | -1.600000 |
| E42G     | -1.208000 | 0.160000  | -1.014000 | -2.030000 | -0.800000 | 0.284824  | -0.530000 |
| E42D     | -0.993000 | -0.960000 | -0.949000 | -0.900000 | -0.400000 | 0.331035  | -0.160000 |
| F44S     | -2.761000 | -2.800000 | -2.899000 | -3.530000 | -2.300000 | 3.008940  | -2.820000 |
| F44L     | -1.120000 | -2.310000 | -1.323000 | -2.270000 | 1.000000  | 1.170348  | -1.700000 |
| F44Y     | -0.611000 | -0.160000 | -0.366000 | -0.010000 | -0.300000 | 0.730337  | -1.530000 |
| A45S     | -1.056000 | -1.530000 | -1.025000 | -0.350000 | -0.600000 | 1.588476  | -0.310000 |
| A45D     | -0.628000 | -1.010000 | -0.460000 | -0.240000 | -1.700000 | 2.452025  | -0.400000 |
| A45T     | -0.861000 | -0.290000 | -0.575000 | -0.250000 | -0.300000 | 0.943673  | -0.330000 |
| A45G     | -0.859000 | 0.530000  | -0.441000 | -1.030000 | -1.200000 | 1.678345  | -0.400000 |
| G47E     | -1.077000 | -0.380000 | -0.795000 | -0.480000 | -0.600000 | 1.876033  | -0.810000 |
| G47R     | -0.785000 | -0.510000 | -0.582000 | -1.030000 | 0.100000  | 0.517850  | -0.590000 |
| G47A     | -0.568000 | -0.240000 | -0.314000 | -0.110000 | 0.300000  | -0.074155 | -0.570000 |
| G47V     | -0.411000 | 0.940000  | 0.112000  | -1.150000 | 0.700000  | -0.069220 | -0.910000 |
| T49S     | -1.373000 | -0.980000 | -1.370000 | -1.110000 | -1.700000 | 1.359749  | -1.090000 |
| T49P     | -0.470000 | -0.600000 | -0.424000 | -0.210000 | -2.600000 | 1.369659  | -1.070000 |
| T49A     | -0.862000 | 0.830000  | -0.444000 | -0.450000 | -2.400000 | 1.389565  | -1.250000 |
| T49I     | -0.314000 | 0.410000  | 0.013000  | -0.400000 | -1.300000 | 0.438767  | -1.310000 |
| S50I     | -0.191000 | 1.250000  | 0.341000  | -0.470000 | -0.500000 | -0.192585 | -0.770000 |
| S50R     | -0.368000 | 0.330000  | -0.043000 | 0.160000  | 0.400000  | -0.347085 | -0.590000 |
| E51G     | -0.662000 | -0.160000 | -0.510000 | 0.090000  | -0.600000 | 0.121036  | -0.290000 |
| S52P     | -0.326000 | -0.340000 | -0.199000 | -0.110000 | -0.600000 | 0.692510  | -0.180000 |
| G53E     | -2.923000 | -2.740000 | -3.220000 | -1.090000 | -2.800000 | 2.744853  | -1.700000 |
| G53R     | -1.014000 | -3.520000 | -1.195000 | -1.260000 | -1.900000 | 2.180179  | -1.560000 |
| G53A     | -0.734000 | -1.540000 | -0.806000 | -0.340000 | -2.200000 | 0.615396  | -1.140000 |
| E54D     | -1.089000 | -0.850000 | -1.026000 | -1.160000 | -0.500000 | 1.243156  | -0.680000 |
| E54K     | -0.395000 | -0.150000 | -0.105000 | -0.030000 | 0.900000  | 1.948915  | -0.800000 |
| E54Q     | -0.552000 | -0.720000 | -0.423000 | -0.480000 | 0.700000  | 0.866636  | -0.570000 |
| E54G     | -0.665000 | 0.560000  | -0.332000 | -0.010000 | -1.100000 | 0.916399  | -1.040000 |
| E54L     | 0.452000  | 0.630000  | 0.814000  | 1.350000  | 0.400000  | -0.406742 | -0.710000 |
| L55P     | -1.386000 | -2.190000 | -1.672000 | -1.090000 | -1.900000 | 2.680218  | -1.990000 |
| L55Q     | -1.466000 | -1.040000 | -1.363000 | -2.150000 | -1.800000 | 2.513701  | -1.970000 |
| L55R     | -0.853000 | -1.460000 | -0.778000 | -0.590000 | -1.200000 | 2.331249  | -1.890000 |
| H56R     | -0.060000 | -0.610000 | 0.094000  | 0.440000  | 0.100000  | 0.140162  | -0.560000 |
| G57R     | -0.443000 | -2.390000 | -0.509000 | -0.270000 | 1.000000  | 0.355795  | -0.600000 |

*Continued on next page*

| Mutation | mCSM      | SDM       | DUET      | DynaMut2  | DDGun     | MAESTRO   | SAAFEC    |
|----------|-----------|-----------|-----------|-----------|-----------|-----------|-----------|
| L58R     | -0.560000 | -2.460000 | -0.630000 | 1.070000  | -2.200000 | 2.739356  | -1.190000 |
| L58H     | -0.839000 | -0.720000 | -0.847000 | -0.580000 | -2.500000 | 2.273616  | -1.260000 |
| T59K     | -0.346000 | -1.490000 | -0.338000 | -0.080000 | -1.100000 | 2.223868  | -1.070000 |
| T59R     | -0.541000 | -1.350000 | -0.506000 | -0.170000 | 0.000000  | 1.994997  | -0.930000 |
| T60A     | -0.740000 | -0.250000 | -0.615000 | 0.120000  | -0.200000 | 0.890968  | -0.140000 |
| E61G     | -0.827000 | -0.160000 | -0.688000 | -0.540000 | 0.200000  | 0.053070  | -0.270000 |
| E61K     | -0.016000 | -0.270000 | 0.264000  | 0.200000  | 0.000000  | -0.172136 | -0.220000 |
| E62K     | 0.413000  | -0.270000 | 0.695000  | 1.310000  | -0.100000 | -0.441654 | -0.380000 |
| F64S     | -2.944000 | -3.120000 | -3.093000 | -3.460000 | -2.300000 | 3.257644  | -2.600000 |
| F64I     | -0.572000 | -0.070000 | -0.398000 | 1.260000  | -0.200000 | 1.765091  | -1.920000 |
| F64L     | -0.572000 | -2.240000 | -0.743000 | 0.520000  | 0.300000  | 1.263882  | -1.950000 |
| G67R     | -1.003000 | -0.250000 | -0.756000 | -1.340000 | -1.500000 | 2.123210  | -1.350000 |
| G67E     | -1.671000 | -0.650000 | -1.490000 | -1.300000 | -2.300000 | 1.633188  | -1.270000 |
| I68L     | -0.383000 | -0.560000 | -0.193000 | -0.210000 | -0.400000 | 0.450980  | -0.750000 |
| Y69H     | -2.277000 | -0.900000 | -2.258000 | -3.060000 | -2.700000 | 3.411389  | -1.780000 |
| Y69I     | -1.148000 | 0.570000  | -0.828000 | -1.700000 | -3.100000 | 2.176070  | -1.480000 |
| K70N     | -1.977000 | -0.630000 | -1.957000 | -2.360000 | -0.300000 | 0.780808  | -0.470000 |
| V71A     | -2.708000 | -2.660000 | -3.176000 | -3.440000 | -2.300000 | 2.510127  | -1.680000 |
| E72G     | -2.431000 | 1.080000  | -2.031000 | -2.420000 | -0.700000 | 1.048607  | -0.470000 |
| I73V     | -2.018000 | -2.380000 | -2.399000 | -1.11     | -0.500000 | 1.544197  | -1.320000 |
| D74H     | -1.138000 | 0.380000  | -0.881000 | -1.540000 | 1.000000  | 0.926688  | -0.690000 |
| S77Y     | -0.631000 | 0.710000  | -0.339000 | -1.360000 | 0.300000  | -0.074396 | -0.860000 |
| S77F     | -0.918000 | 0.760000  | -0.605000 | -0.280000 | 0.300000  | -0.470808 | -0.730000 |
| Y78F     | -0.723000 | -0.510000 | -0.542000 | -0.440000 | -1.500000 | 0.914390  | -1.340000 |
| A81T     | -0.663000 | -1.970000 | -0.696000 | 0.290000  | 0.000000  | 0.360463  | -0.250000 |
| A81V     | -0.219000 | -1.030000 | -0.130000 | -1.120000 | 0.000000  | 0.334558  | -0.160000 |
| G83R     | -0.388000 | -2.390000 | -0.457000 | -0.290000 | -0.100000 | 0.071862  | -0.990000 |
| I84S     | -1.771000 | -2.260000 | -1.918000 | -1.320000 | -0.800000 | 1.452406  | -0.800000 |
| I84N     | -1.025000 | -1.430000 | -0.978000 | -1.360000 | -0.900000 | 1.104595  | -0.480000 |
| I84T     | -1.526000 | -1.460000 | -1.510000 | -1.230000 | -0.400000 | 1.403141  | -0.600000 |
| H88R     | -0.823000 | -0.210000 | -0.623000 | -0.460000 | -0.700000 | 1.272331  | -0.770000 |
| E89Q     | -0.269000 | -0.900000 | -0.162000 | -0.040000 | 0.400000  | -0.037222 | -0.790000 |
| E89K     | -0.005000 | -0.400000 | 0.250000  | 0.220000  | -0.200000 | 0.046183  | -1.070000 |
| H90N     | -0.107000 | -0.980000 | -0.158000 | 0.390000  | -1.000000 | 0.819017  | -1.380000 |
| H90D     | -0.259000 | -0.820000 | -0.227000 | 0.400000  | -1.500000 | 1.256770  | -1.120000 |
| A91S     | -1.801000 | -2.420000 | -1.977000 | -2.010000 | -0.900000 | 1.682146  | -1.300000 |
| E92K     | -1.138000 | -0.580000 | -0.990000 | -1.170000 | -0.500000 | 0.200088  | -0.820000 |
| V93M     | -0.439000 | -2.060000 | -0.967000 | -1.070000 | -1.300000 | 0.892321  | -1.190000 |
| V94A     | -1.122000 | -1.410000 | -1.200000 | -1.410000 | -1.300000 | 1.277868  | -1.470000 |
| A97S     | -1.055000 | -2.420000 | -1.192000 | -0.330000 | -0.400000 | 1.529493  | -1.130000 |
| A97G     | -0.832000 | -0.430000 | -0.643000 | -1.170000 | -1.400000 | 1.744698  | -1.120000 |
| G101S    | -0.678000 | -3.480000 | -0.988000 | -0.240000 | 0.600000  | 0.990593  | -0.560000 |
| P102R    | -0.110000 | 0.070000  | 0.124000  | 0.160000  | 0.600000  | 0.278971  | -0.040000 |

*Continued on next page*

| Mutation | mCSM      | SDM       | DUET      | DynaMut2  | DDGun     | MAESTRO   | SAAFEC    |
|----------|-----------|-----------|-----------|-----------|-----------|-----------|-----------|
| R103S    | -1.851000 | -1.560000 | -2.057000 | -2.050000 | -0.500000 | 1.293087  | -0.810000 |
| R104H    | -1.485000 | 0.070000  | -1.372000 | -1.260000 | 2.000000  | 0.126805  | -0.790000 |
| R104C    | -0.669000 | -0.030000 | -0.567000 | 0.510000  | -1.900000 | 0.037933  | -1.060000 |
| I107V    | -1.620000 | -2.380000 | -1.968000 | -1.050000 | 0.500000  | 1.472897  | -1.100000 |
| I107M    | -1.071000 | -1.910000 | -1.424000 | -1.560000 | -1.000000 | 1.844882  | -1.270000 |
| I107F    | -1.635000 | -1.490000 | -1.942000 | -2.590000 | -1.500000 | 1.954769  | -1.600000 |
| A109S    | -1.575000 | -2.420000 | -1.739000 | -1.470000 | -1.400000 | 2.446090  | -1.350000 |
| A109T    | -1.341000 | -1.720000 | -1.364000 | -1.170000 | -0.100000 | 1.447455  | -1.290000 |
| A109V    | -0.092000 | 0.950000  | 0.434000  | 0.100000  | 2.400000  | 0.271922  | -0.510000 |
| L111M    | -0.737000 | -0.990000 | -0.837000 | 0.300000  | -1.000000 | 1.952754  | -0.830000 |
| S112I    | 0.236000  | 2.020000  | 0.896000  | 0.310000  | -0.200000 | -0.011485 | -0.730000 |
| P113T    | -1.518000 | 0.550000  | -1.083000 | -2.250000 | -2.500000 | 0.927692  | -0.670000 |
| Y114H    | -0.330000 | 0.300000  | 0.040000  | 0.520000  | -1.800000 | -0.125850 | -1.570000 |
| Y114C    | -0.409000 | 0.020000  | -0.165000 | 0.500000  | -3.600000 | -0.017269 | -1.570000 |
| Y114S    | -1.264000 | -0.500000 | -1.074000 | -0.300000 | -3.600000 | -0.295191 | -2.200000 |
| Y116S    | -0.728000 | -1.590000 | -0.688000 | 0.250000  | -4.300000 | 2.405803  | -2.030000 |
| T119M    | 0.031000  | -0.160000 | 0.065000  | 0.230000  | 0.300000  | -0.270595 | -0.950000 |
| A120S    | -0.700000 | -0.910000 | -0.528000 | 0.390000  | -0.100000 | 0.715069  | -1.120000 |
| V122A    | -0.904000 | -1.650000 | -1.018000 | -1.070000 | -0.200000 | 1.091749  | -1.300000 |
| V122I    | -0.367000 | -0.280000 | -0.111000 | -0.540000 | 0.000000  | 0.150486  | -0.290000 |
| P125S    | -0.496000 | 0.000000  | -0.145000 | -0.270000 | 0.000000  | 0.187510  | -0.920000 |

| Parameter                       | Protein  | Protein-Ligand complex |
|---------------------------------|----------|------------------------|
| Simulation Time                 | 100 ns   | 100 ns                 |
| Integration timestep            | 0.02 fs  | 0.02 fs                |
| Water model                     | tip3p    | tip3p                  |
| Simulation box shape            | cubic    | cubic                  |
| Simulation box dimension        | 11-12*   | 11-12*                 |
| Position restrain NVT and NPT   | DPOSRES  | DPOSRES                |
| LINCS constrains                | h-bonds  | h-bonds                |
| Electrostatic force calculation | PME      | PME                    |
| Force field                     | CHARMM36 | CHARMM36               |
| Temperature                     | 300      | 300                    |

Supplementary Table 2: Molecular dynamics parameters used. (\*Box dimension varies between different TTR variants, created with a distance between the solute and the box of 2 nm.)

## Supplementary Figures

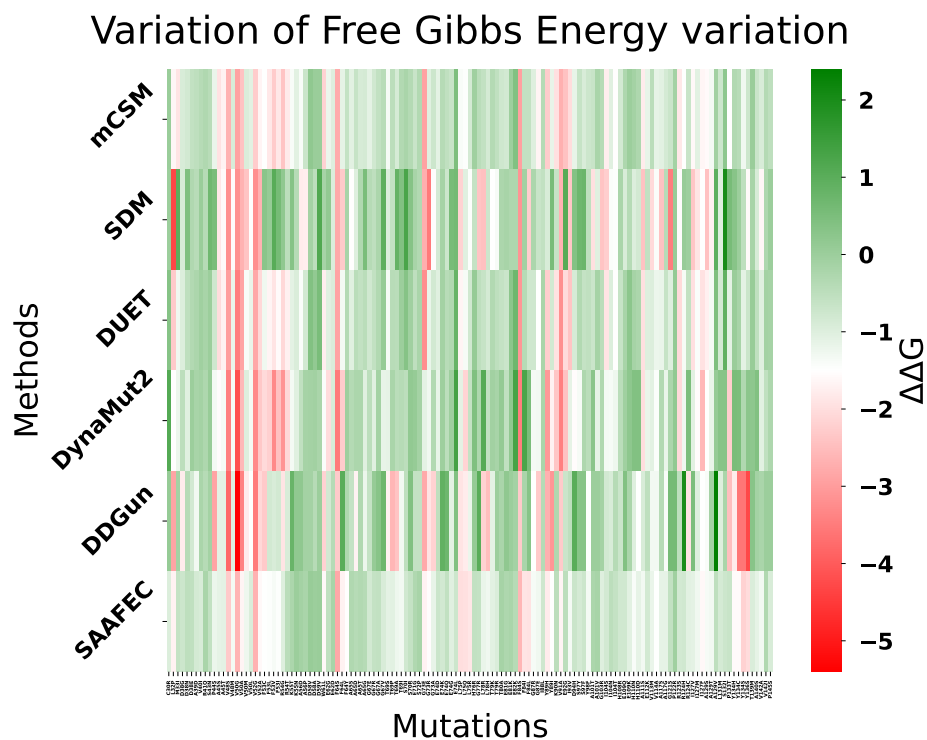

Supplementary Figure 1: Heatmap showing the predicted Gibbs free energy changes ( $\Delta\Delta G$ ) for each TTR mutation across different computational tools. Red and green colours indicate destabilizing and stabilizing mutations, respectively. The use of multiple predictors highlights variability in estimated mutation effects.

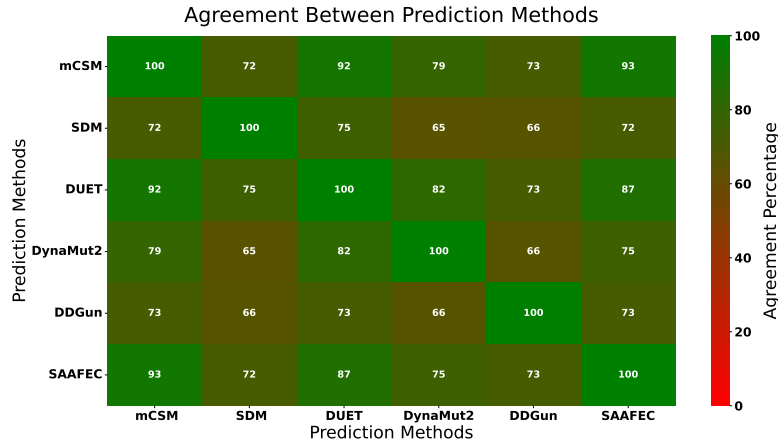

Supplementary Figure 2: Agreement heatmap for stabilizing versus destabilizing classification, highlighting tool concordance in pathogenicity prediction. Agreement values are reported using a green-red colormap, with green cells reporting methods with high agreement while red depicting methods with low agreement in  $\Delta\Delta G$  prediction.

Hierarchical Clustering Dendrogram for TTR monomer (Average Linkage)

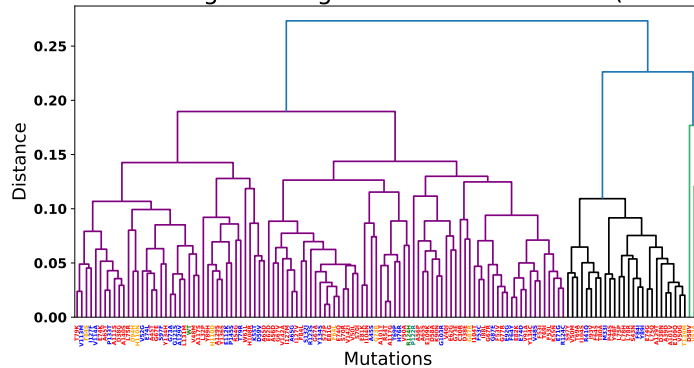

Supplementary Figure 3: Hierarchical clustering analysis of TTR variants based on TM-score similarity. Clinical categories are color-coded: red (Pathogenic), orange (Likely pathogenic), green (Benign), teal (Likely benign), and blue (Unknown). Three clusters are reported in the dendrogram, colored in purple, black and sea-green.

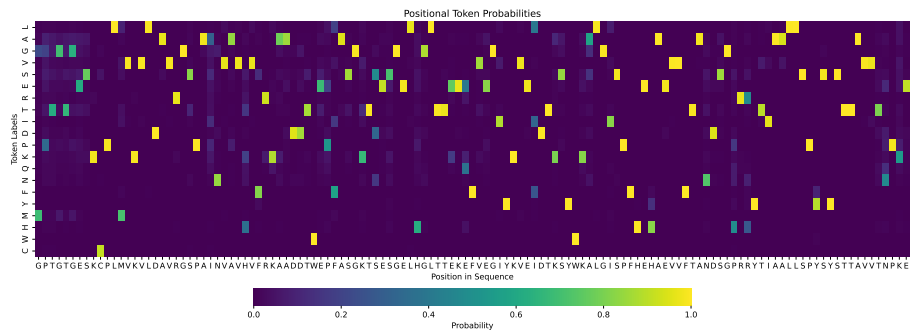

Supplementary Figure 4: **Residue-level mutation probabilities predicted by ESM2 for the wild-type TTR monomer.** The heatmap depicts the estimated mutability at each residue position, with higher values (depicted in green-yellow) indicating regions of increased evolutionary flexibility. Structural or functional hotspots typically exhibit lower mutability.

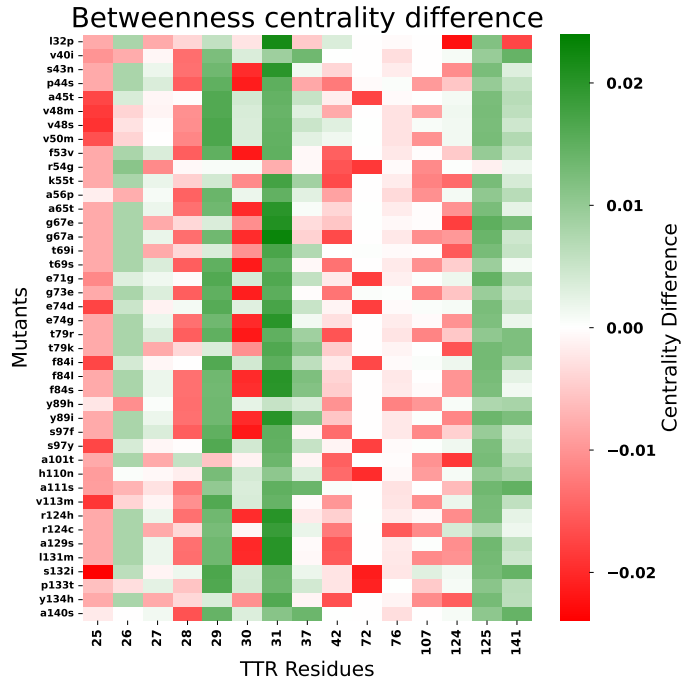

Supplementary Figure 5: Residue-level differences in betweenness centrality between wild-type and mutant TTR tetramers. Only one representative chain is shown; figure includes only mutations with at least five altered residues.

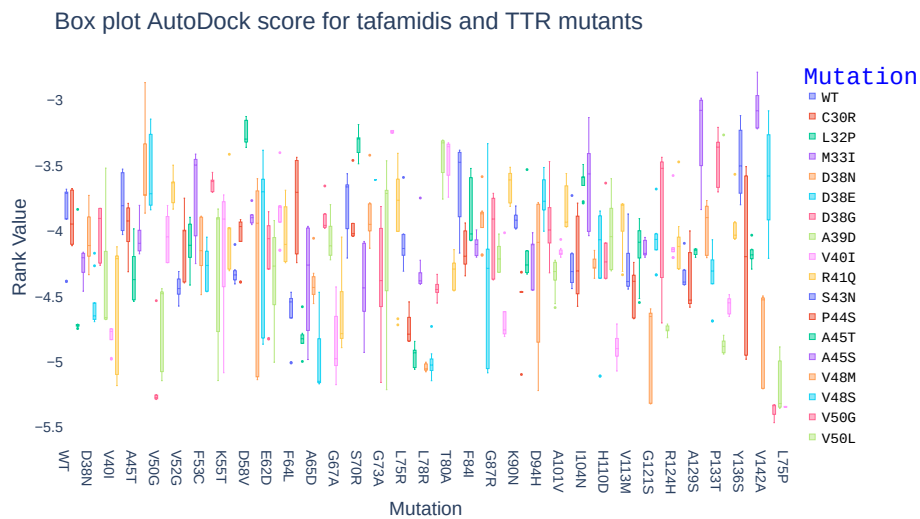

Supplementary Figure 6: Distribution of AutoDock Vina binding affinities across TTR tetramer mutants for tafamidis.

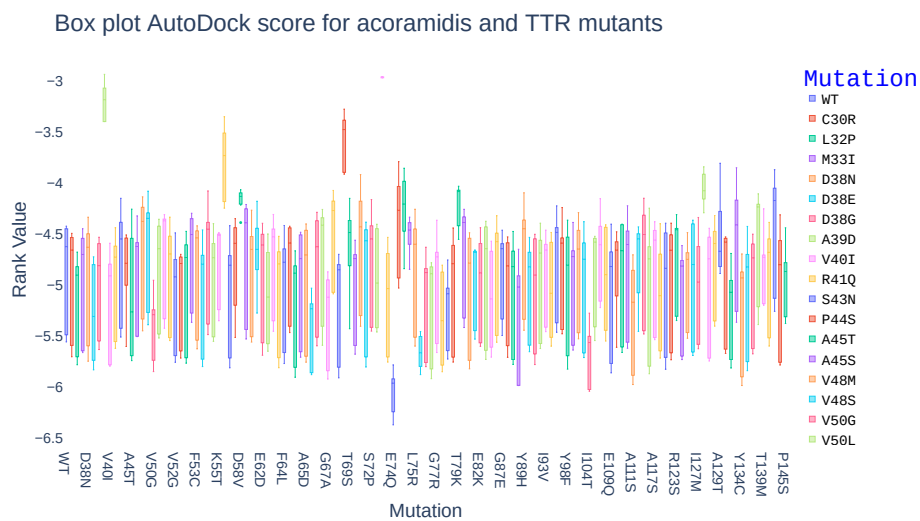

Supplementary Figure 7: Distribution of AutoDock Vina binding affinities across TTR tetramer mutants for acoramidis.

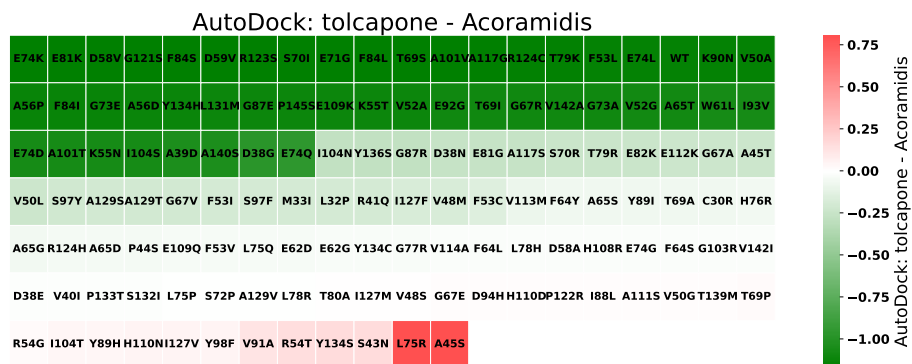

Supplementary Figure 8: Evaluation of tolcapone ligand targeting TTR mutants. White cells depicts mutations that report approximately no changes in binding affinity, while red and green ones depict mutations with decreased or increased binding affinity againsta acoramidis ligand.

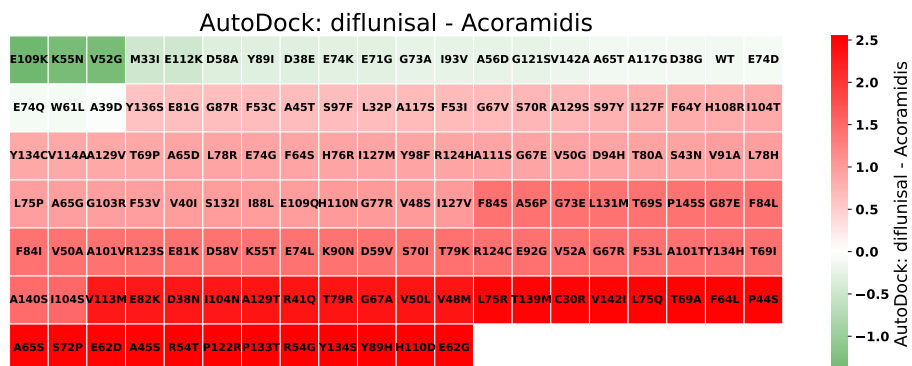

Supplementary Figure 9: Evaluation of diflunisal ligand targeting TTR mutants. White cells depicts mutations that report approximately no changes in binding affinity, while red and green ones depict mutations with decreased or increased binding affinity againsta acoramidis ligand.

TM-scores between TTR mutants in monomer conformation

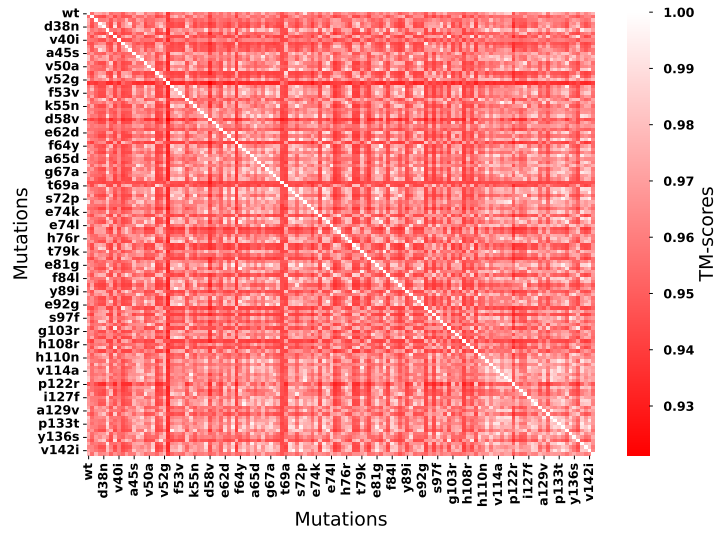

Supplementary Figure 10: Heatmap with TM-Score calculated for the monomer.

TM-scores between TTR mutants in tetramer conformation

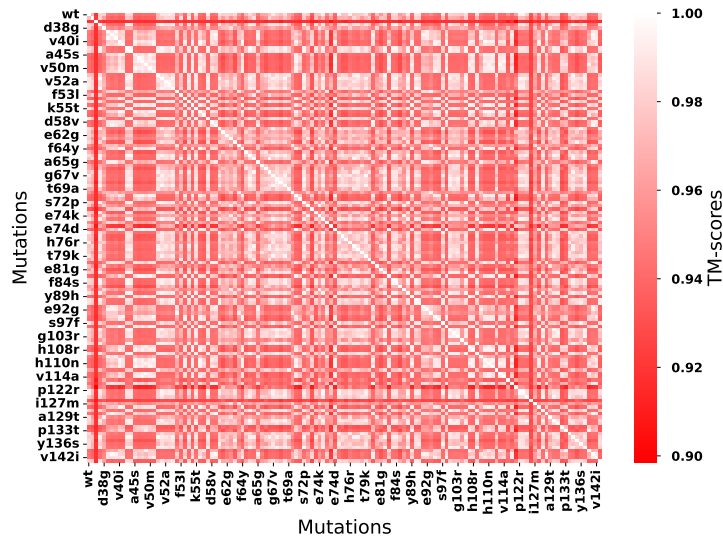

Supplementary Figure 11: Heatmap with TM-Score calculated for the tetramer.

TTR Mutations in Italian Regions

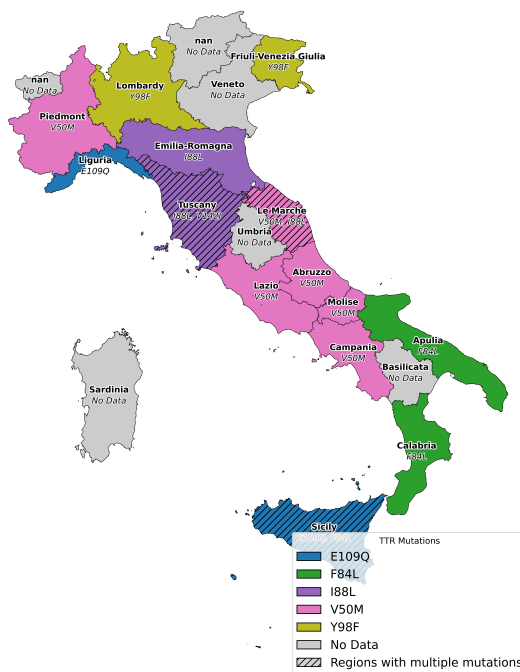

Supplementary Figure 12: Geographical distribution of most common TTR mutations in Italian regions. Data obtained from [1]

## References

- [1] Massimo Russo, Laura Obici, Ilaria Bartolomei, Francesco Cappelli, Marco Luigetti, Silvia Fenu, Tiziana Cavallaro, Maria Grazia Chiappini, Chiara Gemelli, Luca Guglielmo Pradotto, Fiore Manganelli, Luca Leonardi, Filomena My, Simone Sampaolo, Chiara Briani, Luca Gentile, Claudia Stancanelli, Eleonora Di Buduo, Paolo Pacciolla, Fabrizio Salvi, Silvia Casagrande, Giulia Bisogni, Daniela Calabrese, Fiammetta Vanoli, Giuseppe Di Iorio, Giovanni Antonini, Lucio Santoro, Alessandro Mauro, Marina Grandis, Marco Di Girolamo, Gian Maria Fabrizi, Davide Pareyson, Mario Sabatelli, Federico Perfetto, Claudio Rapezzi, Giampaolo Merlini, Anna Mazzeo, and Giuseppe Vita and. Attrv amyloidosis italian registry: clinical and epidemiological data. *Amyloid*, 27(4):259–265, 2020. PMID: 32696671.
